# Supplementary material for: Varietal and seasonal differences in the effects of commercial bumblebees on fruit quality in strawberry crops
Source: PubMed Central journal article supplement (PMC6686987; doi:10.1016/j.agee.2019.04.007), 2019-09-01
Supplement: mmc2.pdf [file mmc2.pdf]

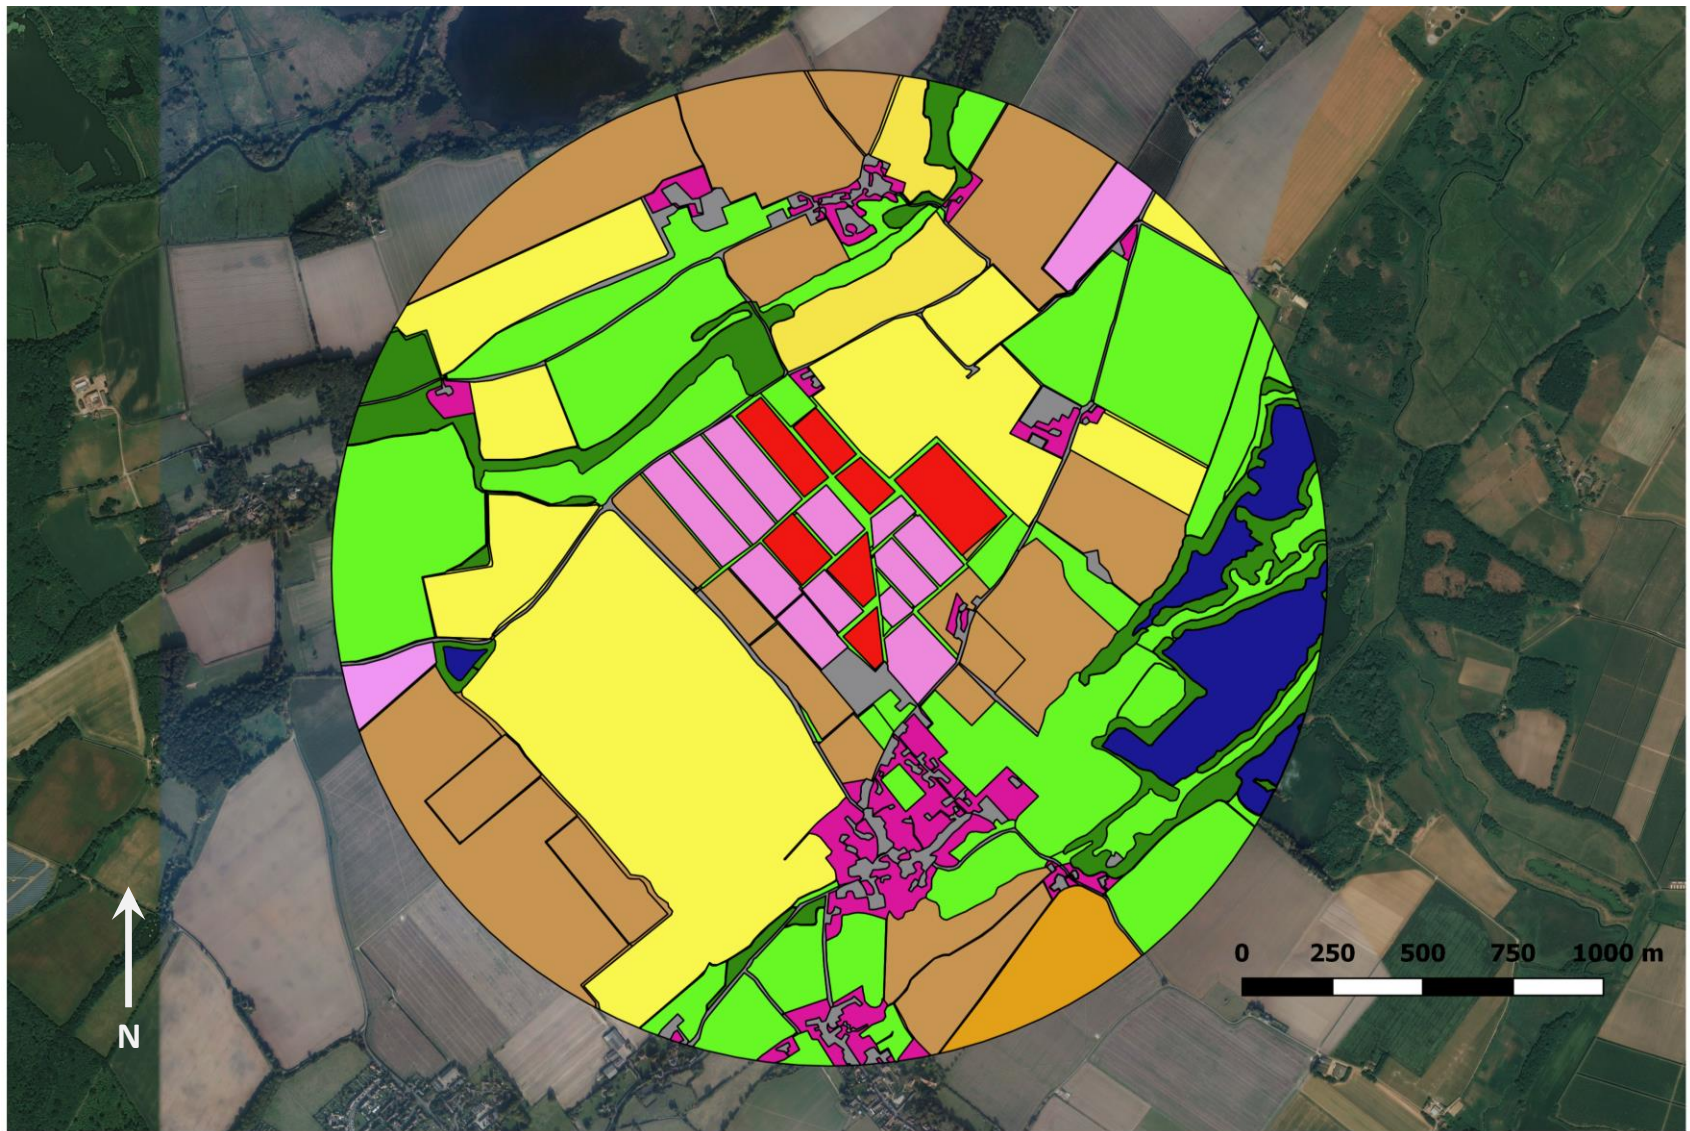

Legend:

- |                                                                                                                   |                                                                                                     |
|-------------------------------------------------------------------------------------------------------------------|-----------------------------------------------------------------------------------------------------|
|  Cereal                        |  Man made      |
|  Experimental strawberry field |  Other arable  |
|  Fruit                         |  Pasture/grass |
|  Garden                        |  Water         |
|  Legumes                       |  Wood          |
